# Supplementary material
Source: PubMed Central journal article supplement (PMC5144734)

Supplemental Figure S1.

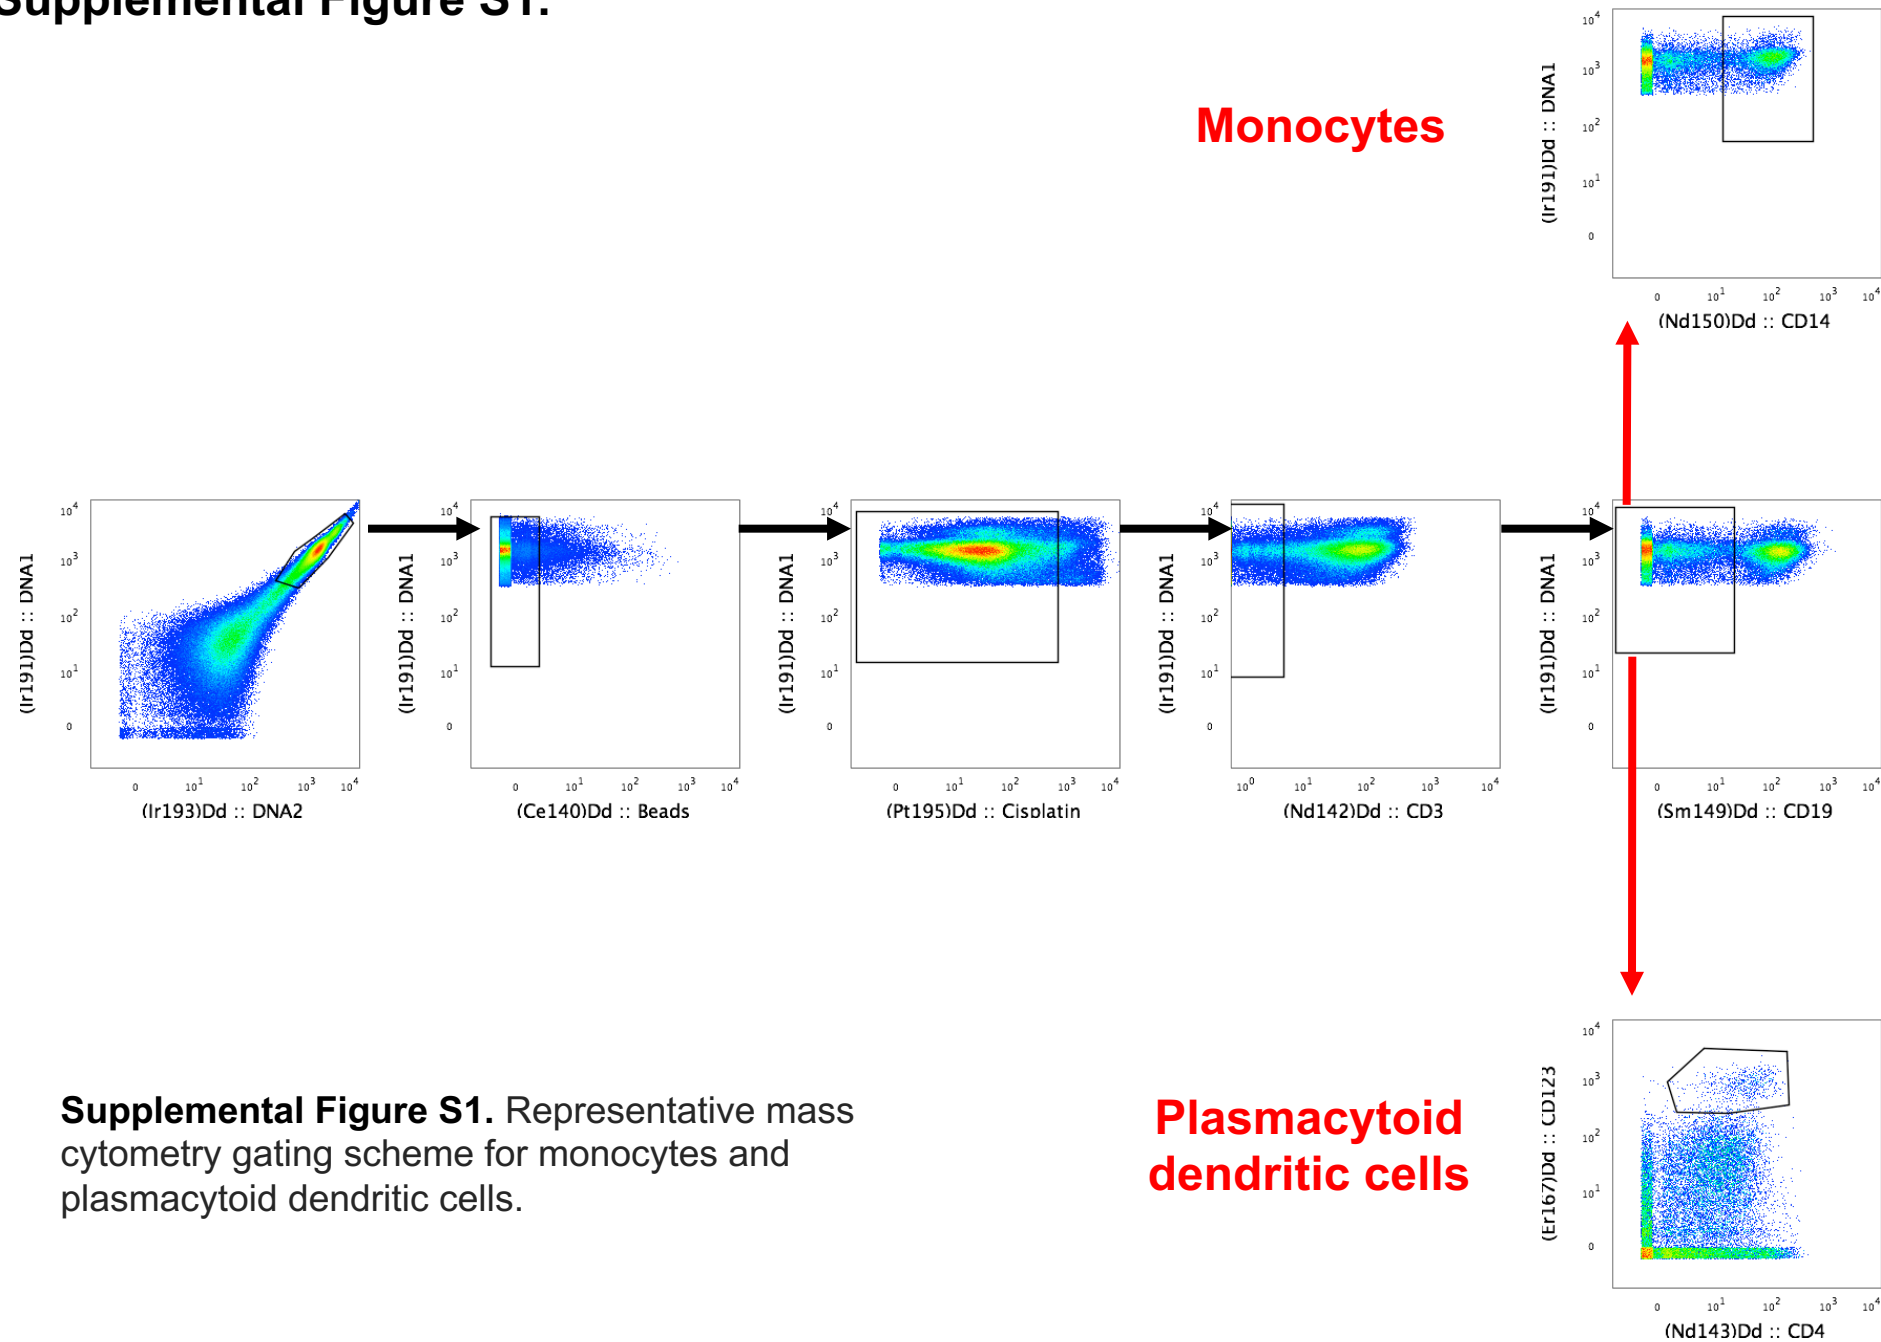

**Supplemental Figure S1.** Representative mass cytometry gating scheme for monocytes and plasmacytoid dendritic cells.

## Supplemental Figure S2.

A

IFN $\alpha$ <sup>+</sup> monocytes

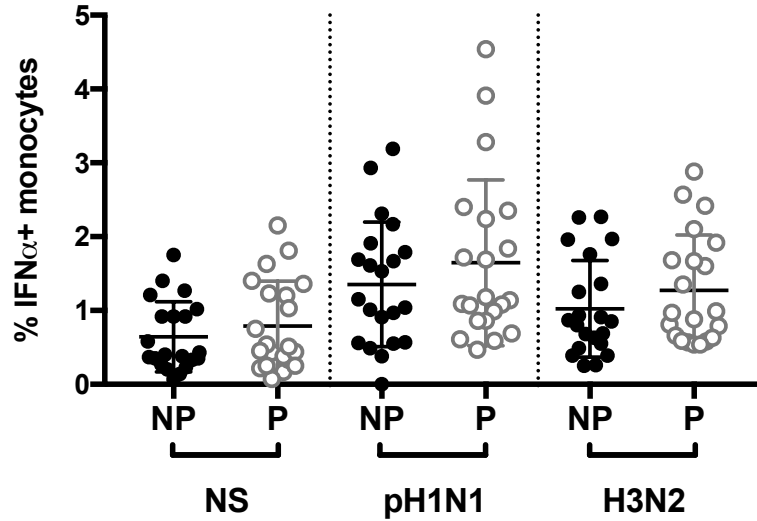

B

IFN $\alpha$ <sup>+</sup> pDCs

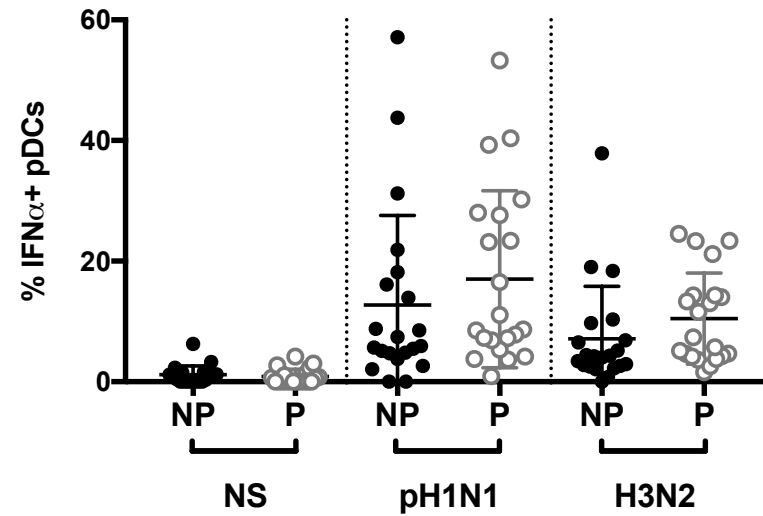

### Supplemental Figure S2.

PBMCs from non-pregnant (NP-black dots) and pregnant (P-grey dots) women were infected or not with pH1N1 or H3N2 IAV at a MOI of 3 for 7hrs. A and B, Frequency of IFN $\alpha$ -producing monocytes and pDCs, respectively. Each dot represents the cell frequency for one patient. Bars represent the mean of each population represented.



# Supplementary Figure 4

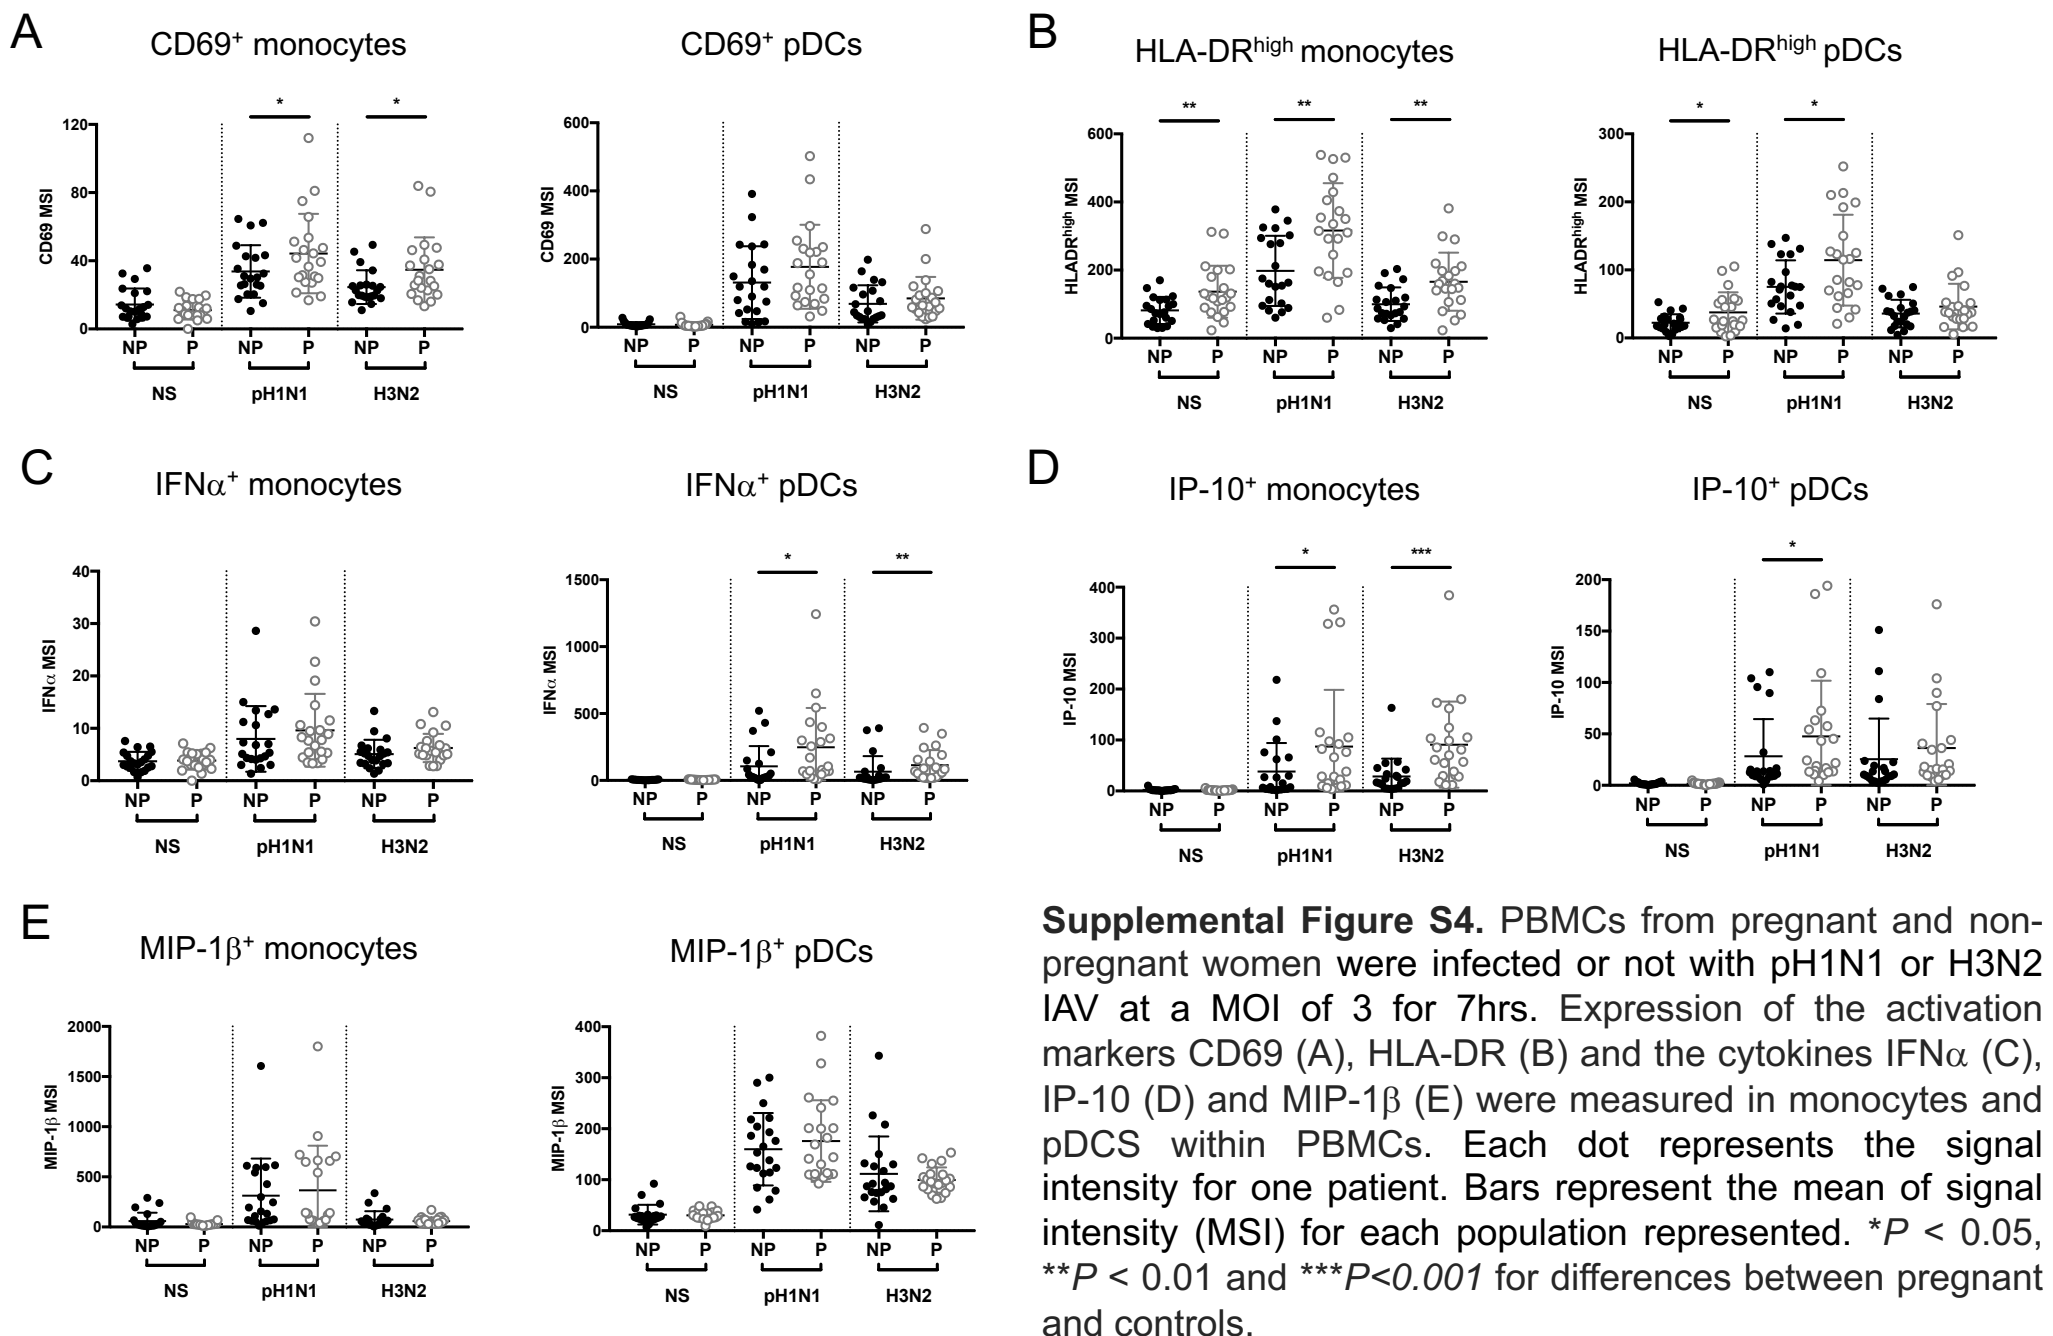

Supplement: supp_jiw448_jiw448supp_figs.pdf [file supp_jiw448_jiw448supp_figs.pdf]
