# Supplementary material
Source: PubMed Central journal article supplement (PMC5144734)
Supplement: supp_jiw448_jiw448supp_table.pdf [file supp_jiw448_jiw448supp_table.pdf]

**Table S1.** Mass cytometry antibody panel and their corresponding bound isotopes

| <b>Marker</b> | <b>Clone</b> | <b>Isotope</b> |
|---------------|--------------|----------------|
| HLA-DR        | Tu36         | 112 Nd         |
| CD3           | UCHT1        | 142 Nd         |
| CD4           | SK3          | 143 Nd         |
| CD19          | HIB19        | 149 Sm         |
| CD14          | M5E2         | 150 Nd         |
| Nucleoprotein | AA5H         | 151 Eu         |
| IFN $\alpha$  | LT27:295     | 153 Eu         |
| CD123         | 6H6          | 167 Er         |
| MIP-1 $\beta$ | D21-1351     | 168 Er         |
| CD69          | FN50         | 169 Tm         |
| IP-10         | J034D6       | 170 Yb         |

**Table S2.** Frequency and Mean Signal Intensity (MSI) of monocytes from pregnant and non-pregnant women expressing activation markers and cytokine/chemokines in response to pH1N1 and H3N2 compared to unstimulated conditions. Statistical differences are represented by \* $P < 0.05$ , \*\* $P < 0.01$ , \*\*\* $P < 0.001$  and \*\*\*\* $P < 0.0001$  for differences between unstimulated and pH1N1 or H3N2 infection conditions.

**Non pregnant women  
Cell frequency**

| Monocytes                    | NS              | H1N1                 | H3N2                 |
|------------------------------|-----------------|----------------------|----------------------|
| % Monocytes                  | 6.73 +/- 6.87   | 3.22 +/- 3.15        | 2.68 +/- 3.12        |
| % FluNP <sup>+</sup>         | 1.21 +/- 1.65   | **** 14.03 +/- 10.56 | **** 30.30 +/- 14.65 |
| % CD69 <sup>+</sup>          | 0.79 +/- 1.06   | **** 5.86 +/- 5.75   | **** 3.59 +/- 3.24   |
| % HLA-DR <sup>high</sup>     | 12.92 +/- 12.26 | **** 45.89 +/- 25.47 | * 21.49 +/- 15.30    |
| % MIP-1 $\beta$ <sup>+</sup> | 11.16 +/- 15.70 | **** 42.13 +/- 27.13 | * 16.69 +/- 13.01    |
| % IP-10 <sup>+</sup>         | 1.01 +/- 0.90   | **** 18.65 +/- 19.93 | **** 16.13 +/- 10.03 |
| % IFN $\alpha$ <sup>+</sup>  | 0.64 +/- 0.47   | ** 1.35 +/- 0.84     | * 1.02 +/- 0.65      |

**MSI**

| Monocytes                  | NS              | H1N1                  | H3N2                |
|----------------------------|-----------------|-----------------------|---------------------|
| CD69 <sup>+</sup>          | 14.38 +/- 9.36  | ****33.79 +/- 15.41   | ***24.55 +/- 9.86   |
| HLA-DR <sup>high</sup>     | 81.59 +/- 39.85 | ****197.72 +/- 103.12 | 99.86 +/- 49.15     |
| MIP-1 $\beta$ <sup>+</sup> | 59.62 +/- 82.27 | ****312.58 +/- 369.33 | 73.97 +/- 83.20     |
| IP-10 <sup>+</sup>         | 2.07 +/- 2.20   | ****38.32 +/- 55.85   | ****28.54 +/- 35.00 |
| IFN $\alpha$ <sup>+</sup>  | 3.71 +/- 1.81   | **8.00 +/- 6.27       | 5.10 +/- 2.71       |

**Pregnant women  
Cell frequency**

| Monocytes                    | NS              | H1N1                 | H3N2                 |
|------------------------------|-----------------|----------------------|----------------------|
| % Monocytes                  | 9.71 +/- 5.94   | 2.68 +/- 3.33        | 4.26 +/- 3.88        |
| % FluNP <sup>+</sup>         | 2.6 +/- 3.98    | **** 11.74 +/- 9.18  | **** 28.94 +/- 13.06 |
| % CD69 <sup>+</sup>          | 0.78 +/- 1.68   | **** 11.00 +/- 11.15 | **** 8.52 +/- 8.37   |
| % HLA-DR <sup>high</sup>     | 29.99 +/- 22.57 | **** 64.90 +/- 22.92 | * 38.07 +/- 21.50    |
| % MIP-1 $\beta$ <sup>+</sup> | 5.64 +/- 6.07   | **** 44.38 +/- 32.13 | **** 15.70 +/- 7.74  |
| % IP-10 <sup>+</sup>         | 1.02 +/- 0.88   | **** 35.46 +/- 23.44 | **** 38.60 +/- 14.40 |
| % IFN $\alpha$ <sup>+</sup>  | 0.79 +/- 0.61   | ** 1.65 +/- 1.12     | ** 1.27 +/- 0.75     |

**MSI**

| Monocytes                  | NS               | H1N1                  | H3N2                |
|----------------------------|------------------|-----------------------|---------------------|
| CD69 <sup>+</sup>          | 11.08 +/- 5.50   | ****44.23 +/- 23.27   | ****34.79 +/- 18.92 |
| HLA-DR <sup>high</sup>     | 136.51 +/- 76.17 | ****316.40 +/- 138.96 | 165.84 +/- 85.19    |
| MIP-1 $\beta$ <sup>+</sup> | 29.89 +/- 20.39  | ****366.36 +/- 444.62 | ****59.85 +/- 35.38 |
| IP-10 <sup>+</sup>         | 1.62 +/- 1.18    | ****87.03 +/- 11.41   | ****90.87 +/- 84.54 |
| IFN $\alpha$ <sup>+</sup>  | 3.84 +/- 1.70    | ****9.63 +/- 6.95     | **6.24 +/- 2.71     |

**Table S3.** Frequency and Mean Signal Intensity (MSI) of pDCs from pregnant and non-pregnant women expressing activation markers and cytokine/chemokines in response to pH1N1 and H3N2 compared to unstimulated conditions. Statistical differences are represented by \* $P < 0.05$ , \*\* $P < 0.01$ , \*\*\* $P < 0.001$  and \*\*\*\* $P < 0.0001$  for differences between unstimulated and pH1N1 or H3N2 infection conditions.

**Non pregnant women  
Cell frequency**

| pDCs                         | NS            | H1N1                 | H3N2                 |
|------------------------------|---------------|----------------------|----------------------|
| % pDCs                       | 0.32 +/- 0.26 | 0.82 +/- 0.76        | 0.74 +/- 0.61        |
| % FluNP <sup>+</sup>         | 1.27 +/- 2.27 | ** 4.06 +/- 3.90     | **** 13.54 +/- 6.93  |
| % CD69 <sup>+</sup>          | 0.41 +/- 0.95 | **** 28.72 +/- 20.13 | **** 16.97 +/- 13.28 |
| % HLA-DR <sup>high</sup>     | 0.61 +/- 1.12 | **** 9.72 +/- 9.25   | ** 2.20 +/- 2.61     |
| % MIP-1 $\beta$ <sup>+</sup> | 0.92 +/- 1.15 | **** 33.74 +/- 15.21 | **** 20.91 +/- 13.13 |
| % IP-10 <sup>+</sup>         | 0.82 +/- 0.89 | **** 15.83 +/- 13.85 | **** 13.76 +/- 13.96 |
| % IFN $\alpha$ <sup>+</sup>  | 1.17 +/- 1.48 | **** 12.72 +/- 14.86 | **** 7.15 +/- 8.67   |

**MSI**

| pDCs                       | NS              | H1N1                  | H3N2                 |
|----------------------------|-----------------|-----------------------|----------------------|
| CD69 <sup>+</sup>          | 8.61 +/- 6.78   | ****131.11 +/- 106.87 | ****68.83 +/- 54.54  |
| HLA-DR <sup>high</sup>     | 22.29 +/- 22.29 | ****75.10 +/- 39.13   | *35.90 +/- 20.19     |
| MIP-1 $\beta$ <sup>+</sup> | 31.60 +/- 31.60 | ****159.90 +/- 70.94  | ****111.49 +/- 73.20 |
| IP-10 <sup>+</sup>         | 1.86 +/- 1.37   | ****28.22 +/- 36.24   | ****25.44 +/- 39.54  |
| IFN $\alpha$ <sup>+</sup>  | 4.29 +/- 2.24   | ****105.71 +/- 151.58 | ****65.78 +/- 115.69 |

**Pregnant women  
Cell frequency**

| pDCs                         | NS            | H1N1                 | H3N2                 |
|------------------------------|---------------|----------------------|----------------------|
| % pDCs                       | 0.55 +/- 0.34 | 1.71 +/- 1.78        | 1.05 +/- 0.77        |
| % FluNP <sup>+</sup>         | 2.90 +/- 4.38 | ** 8.67 +/- 10.43    | **** 12.37 +/- 9.72  |
| % CD69 <sup>+</sup>          | 0.49 +/- 1.01 | **** 36.40 +/- 17.99 | **** 20.11 +/- 12.65 |
| % HLA-DR <sup>high</sup>     | 5.44 +/- 5.95 | *** 20.74 +/- 15.49  | 5.27 +/- 7.40        |
| % MIP-1 $\beta$ <sup>+</sup> | 4.44 +/- 3.55 | **** 49.74 +/- 19.83 | **** 30.25 +/- 7.69  |
| % IP-10 <sup>+</sup>         | 0.89 +/- 0.81 | **** 25.69 +/- 16.18 | **** 22.26 +/- 15.17 |
| % IFN $\alpha$ <sup>+</sup>  | 0.86 +/- 1.23 | **** 17.01 +/- 14.69 | **** 10.49 +/- 7.46  |

**MSI**

| pDCs                       | NS              | H1N1                  | H3N2                  |
|----------------------------|-----------------|-----------------------|-----------------------|
| CD69 <sup>+</sup>          | 7.10 +/- 6.58   | ****177.47 +/- 123.21 | ****84.98 +/- 62.78   |
| HLA-DR <sup>high</sup>     | 37.56 +/- 29.54 | ****114.33 +/- 66.73  | 46.16 +/- 33.55       |
| MIP-1 $\beta$ <sup>+</sup> | 30.25 +/- 9.14  | ****175.79 +/- 79.95  | ****99.40 +/- 24.87   |
| IP-10 <sup>+</sup>         | 1.60 +/- 0.96   | ****47.60 +/- 54.22   | ****36.27 +/- 42.73   |
| IFN $\alpha$ <sup>+</sup>  | 5.17 +/- 2.19   | ****247.58 +/- 294.36 | ****113.76 +/- 113.04 |
